# Supplementary material
Source: publisher figshare collection journal article supplement (https://acs.figshare.com/ndownloader/files/7311887)
Supplement: Supplementary file 1 [file 7311887]

# ***Supporting Information***

## **Microhydration of Neutral and Charged Acetic Acid**

*Parvathi Krishnakumar and Dilip Kumar Maity\**

Bhabha Atomic Research Centre, Mumbai-400085, India and

Homi Bhabha National Institute, Training School Complex, Anushaktinagar, Mumbai-40009,  
India

\*Email for correspondence: [dkmaity@barc.gov.in](mailto:dkmaity@barc.gov.in)

### ***Table of Contents***

**Figure S1: Equilibrium structure and relative energy of conformers for different size of hydrated clusters of acetic acid** **S2**

**Figure S2: Simulated IR spectra of the most stable structure of acetic acid and its hydrated clusters calculated at  $\omega$ B97X-D/aug-cc-pVDZ level of theory.** **S14**

**Figure S1. Equilibrium structure and relative energy (zero point energy corrected) of predicted minimum energy structures with respect to the most stable structure of acetic acid and its microhydrated clusters,  $\text{CH}_3\text{COOH}\cdot n\text{H}_2\text{O}$  ( $n=1-8$ ).**

a)  $\text{CH}_3\text{COOH}$

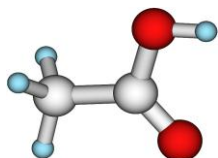

b)  $\text{CH}_3\text{COOH}\cdot 1\text{H}_2\text{O}$

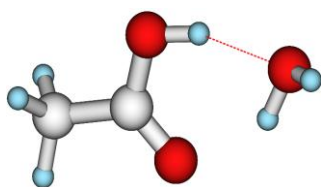

$\Delta E = 0$  kcal/mol

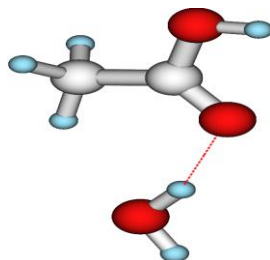

$\Delta E = +3.5$  kcal/mol

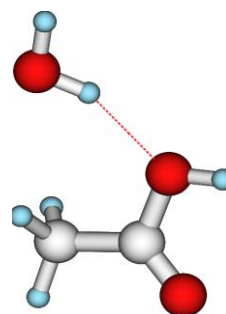

$\Delta E = +5.7$  kcal/mol

c)  $\text{CH}_3\text{COOH}\cdot 2\text{H}_2\text{O}$

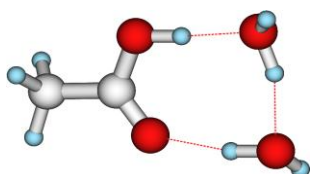

$\Delta E = +0$  kcal/mol

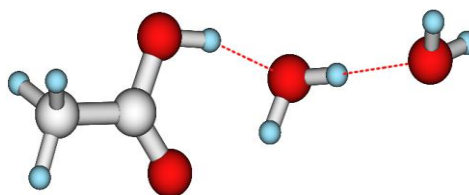

$\Delta E = +5.2$  kcal/mol

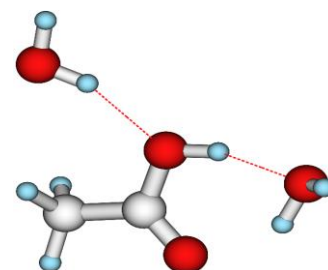

$\Delta E = +6.3$  kcal/mol

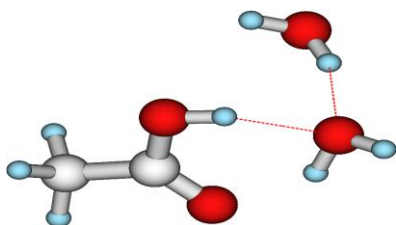

$\Delta E = +7.0$  kcal/mol

d)  $\text{CH}_3\text{COOH} \cdot 3\text{H}_2\text{O}$

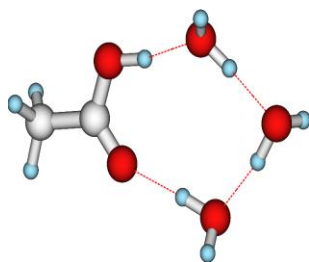

$\Delta E = 0 \text{ kcal/mol}$

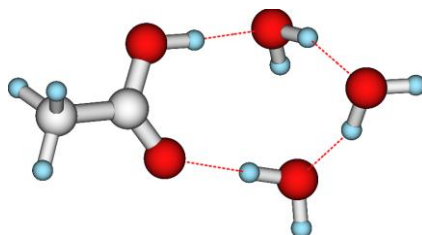

$\Delta E = +0.5 \text{ kcal/mol}$

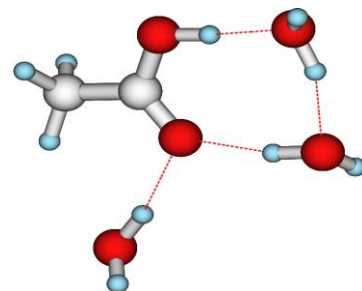

$\Delta E = +2.3 \text{ kcal/mol}$

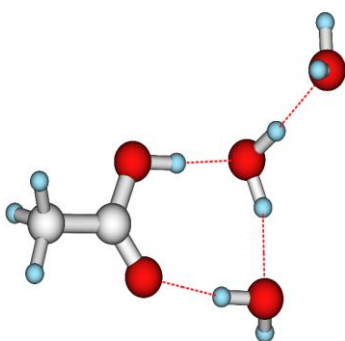

$\Delta E = +2.8 \text{ kcal/mol}$

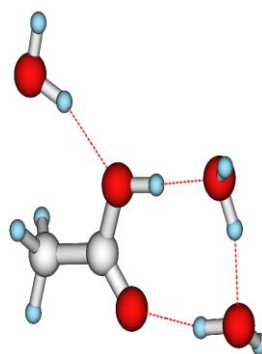

$\Delta E = +3.5 \text{ kcal/mol}$

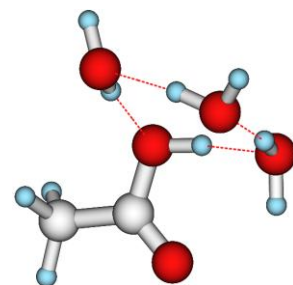

$\Delta E = +3.7 \text{ kcal/mol}$

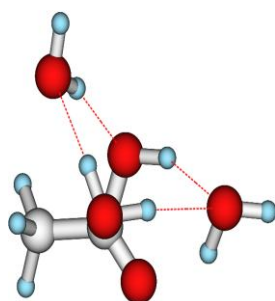

$\Delta E = +8.8 \text{ kcal/mol}$

e)  $\text{CH}_3\text{COOH} \cdot 4\text{H}_2\text{O}$

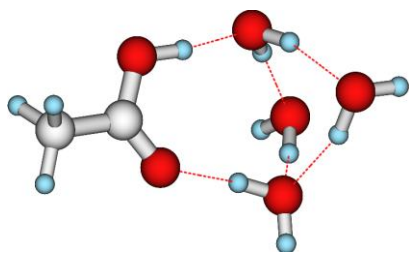

$\Delta E = 0 \text{ kcal/mol}$

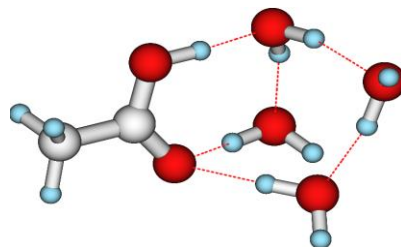

$\Delta E = +1.0 \text{ kcal/mol}$

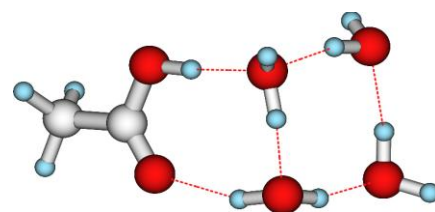

$\Delta E = +1.3 \text{ kcal/mol}$

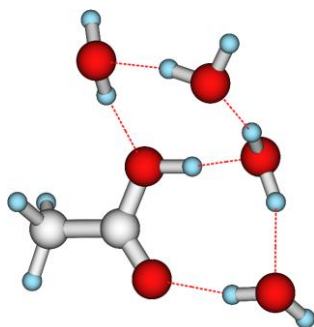

$\Delta E = +2.2 \text{ kcal/mol}$

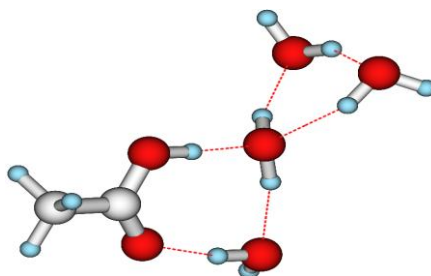

$\Delta E = +3.1 \text{ kcal/mol}$

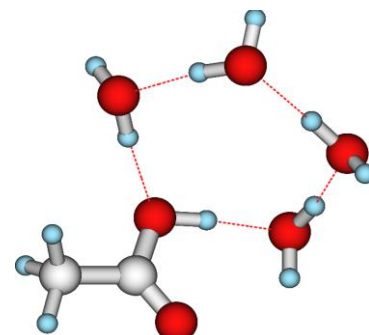

$\Delta E = +4.0 \text{ kcal/mol}$

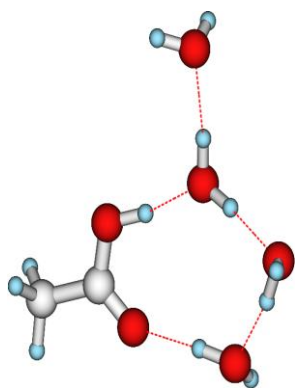

$\Delta E = +4.3 \text{ kcal/mol}$

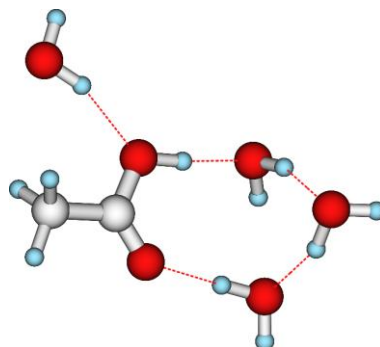

$\Delta E = +4.8 \text{ kcal/mol}$

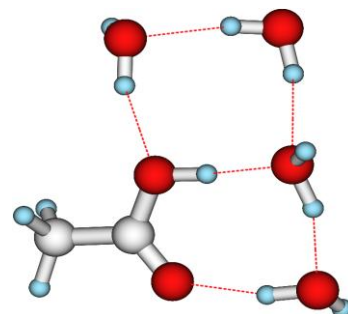

$\Delta E = +7.5 \text{ kcal/mol}$

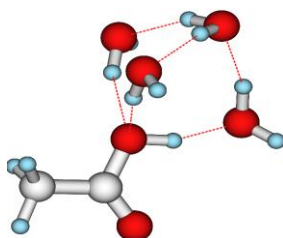

$\Delta E = +7.6 \text{ kcal/mol}$

f)  $\text{CH}_3\text{COOH} \cdot 5\text{H}_2\text{O}$

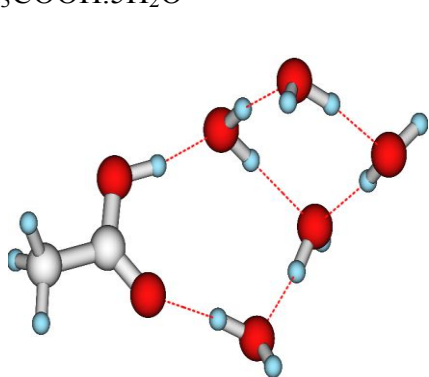

$\Delta E = 0$  kcal/mol

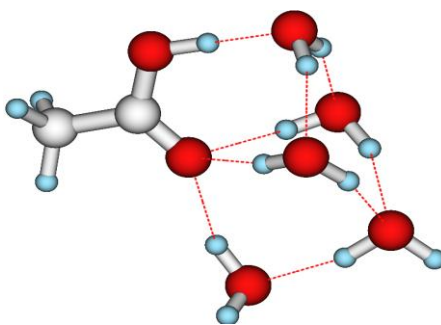

$\Delta E = +0.3$  kcal/mol

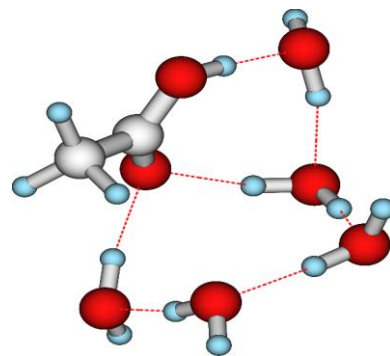

$\Delta E = +0.4$  kcal/mol

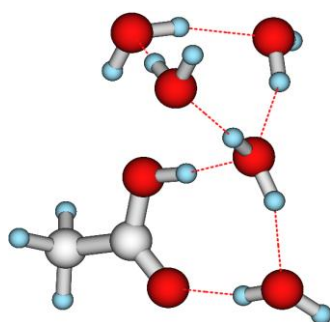

$\Delta E = +0.5$  kcal/mol

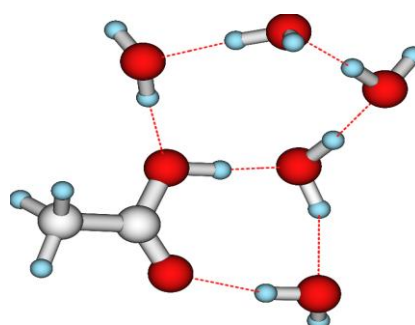

$\Delta E = +0.7$  kcal/mol

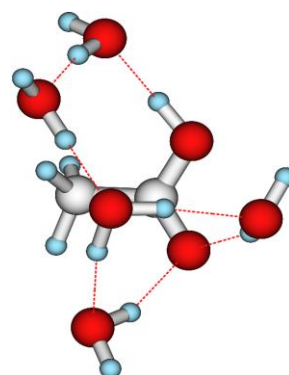

$\Delta E = +1.6$  kcal/mol

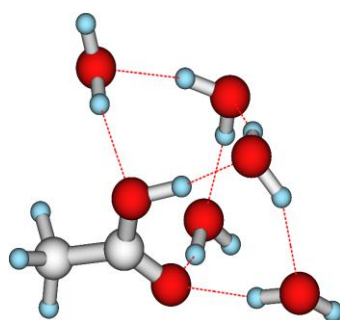

$\Delta E = +1.8$  kcal/mol

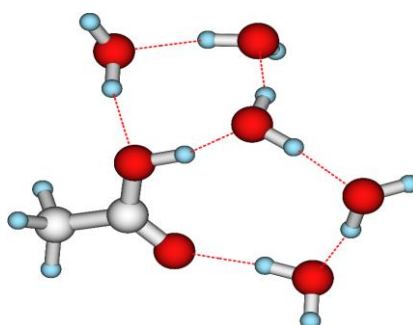

$\Delta E = +2.0$  kcal/mol

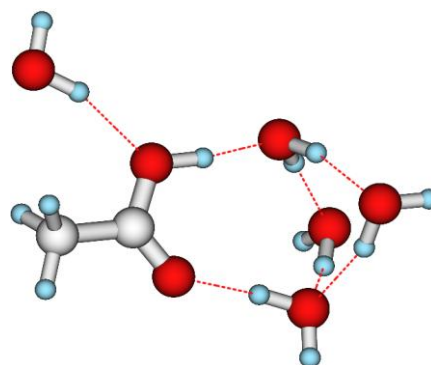

$\Delta E = +2.3$  kcal/mol

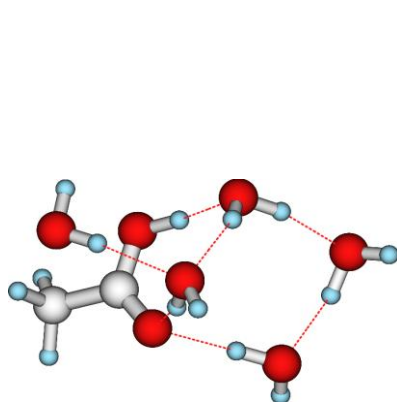

$\Delta E = +2.6$  kcal/mol

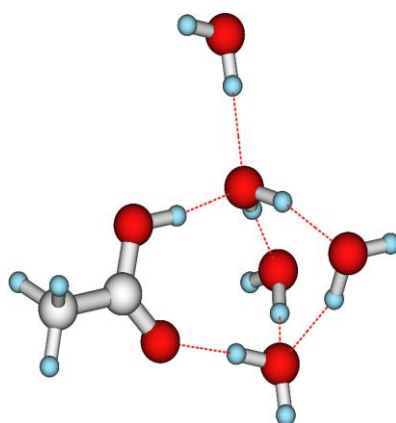

$\Delta E = +2.8$  kcal/mol

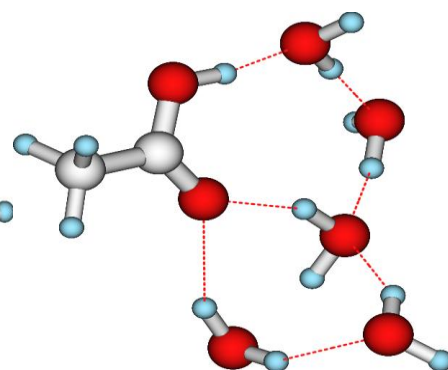

$\Delta E = +3.7$  kcal/mol

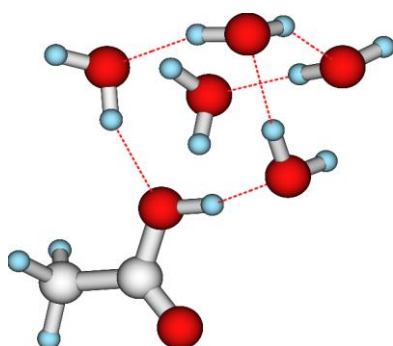

$\Delta E = +6.0$  kcal/mol

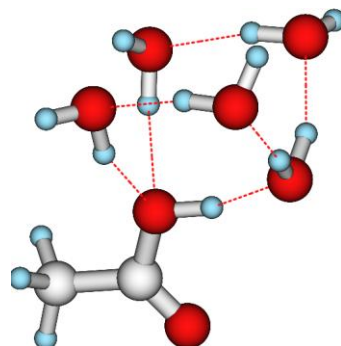

$\Delta E = +6.8$  kcal/mol

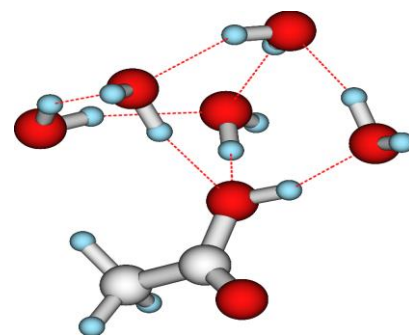

$\Delta E = +8.5$  kcal/mol

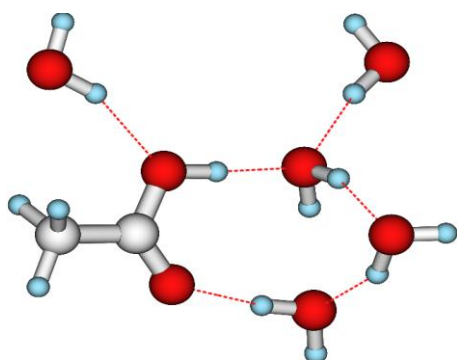

$\Delta E = +8.5$  kcal/mol



g)  $\text{CH}_3\text{COOH} \cdot 6\text{H}_2\text{O}$

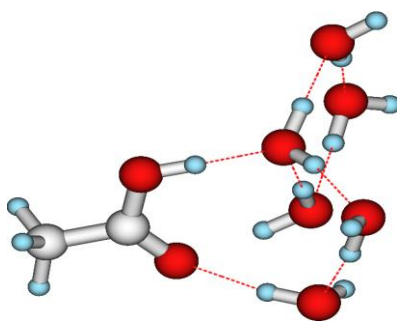

$\Delta E = 0 \text{ kcal/mol}$

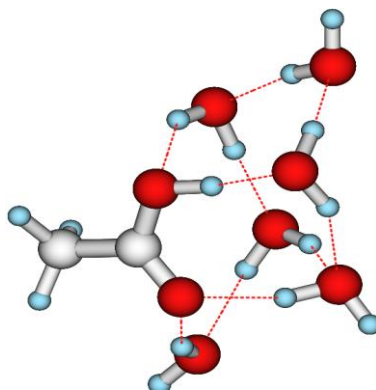

$\Delta E = +0.1 \text{ kcal/mol}$

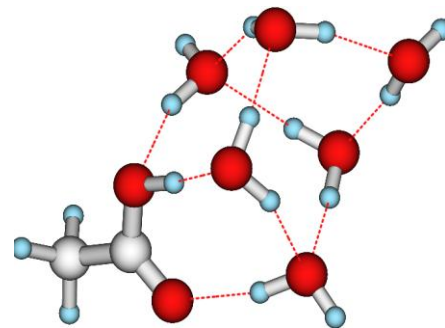

$\Delta E = +0.2 \text{ kcal/mol}$

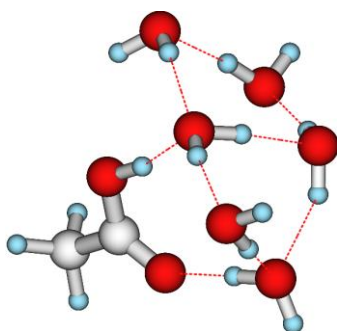

$\Delta E = +0.4 \text{ kcal/mol}$

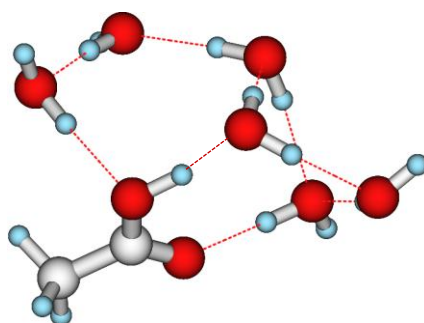

$\Delta E = +0.7 \text{ kcal/mol}$

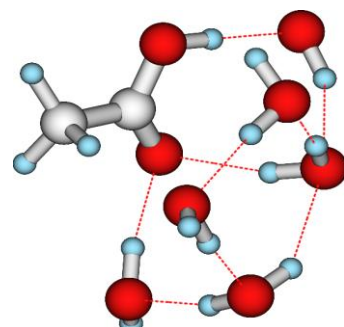

$\Delta E = +0.8 \text{ kcal/mol}$

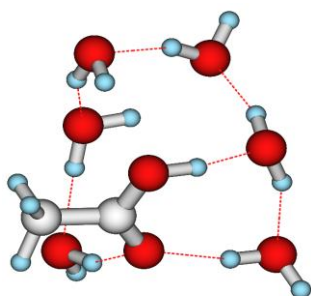

$\Delta E = +1.2 \text{ kcal/mol}$

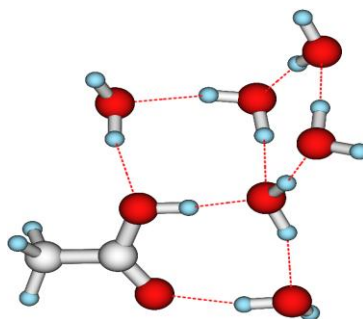

$\Delta E = +1.4 \text{ kcal/mol}$

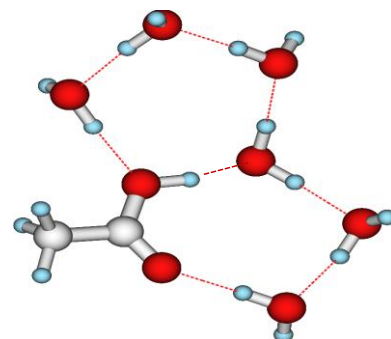

$\Delta E = +2.0 \text{ kcal/mol}$

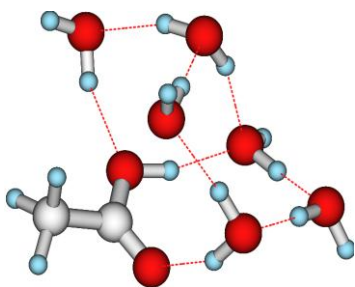

$\Delta E = +2.4 \text{ kcal/mol}$

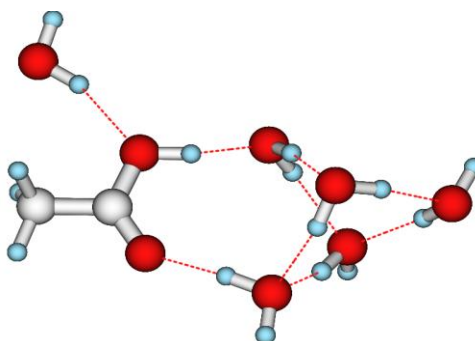

$\Delta E = +2.8 \text{ kcal/mol}$

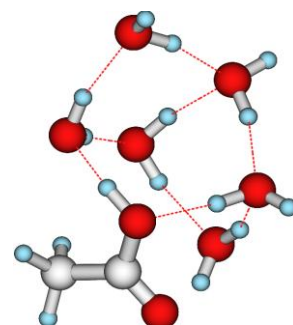

$\Delta E = +3.0 \text{ kcal/mol}$

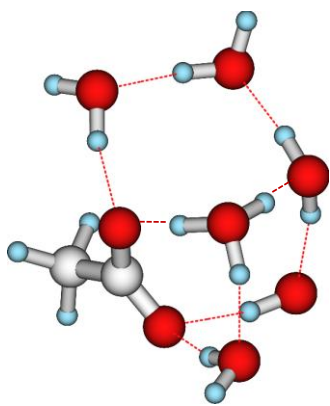

$\Delta E = +3.3$  kcal/mol

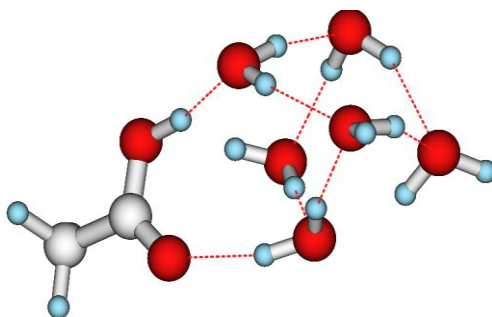

$\Delta E = +3.8$  kcal/mol

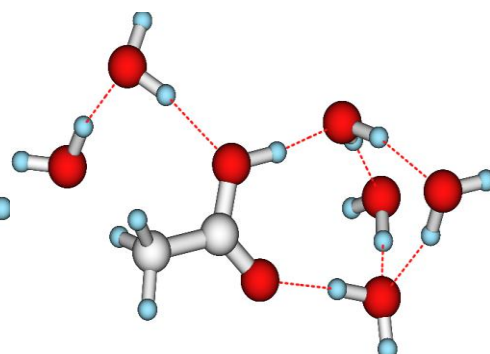

$\Delta E = +4.6$  kcal/mol

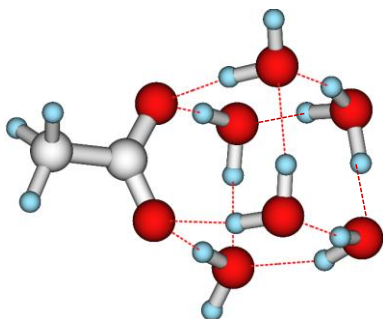

$\Delta E = +4.6$  kcal/mol

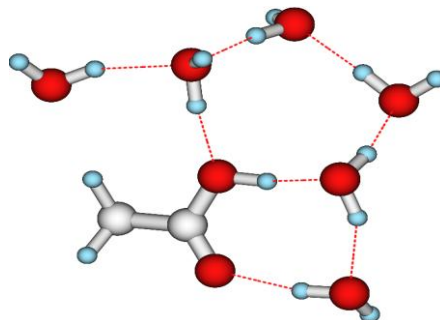

$\Delta E = +5.4$  kcal/mol

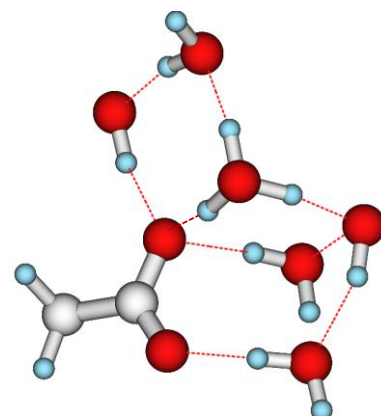

$\Delta E = +5.8$  kcal/mol

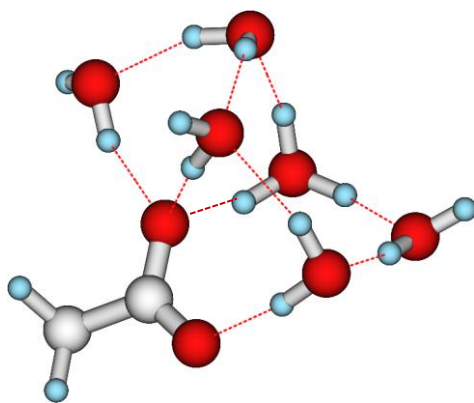

$\Delta E = +6.5$  kcal/mol

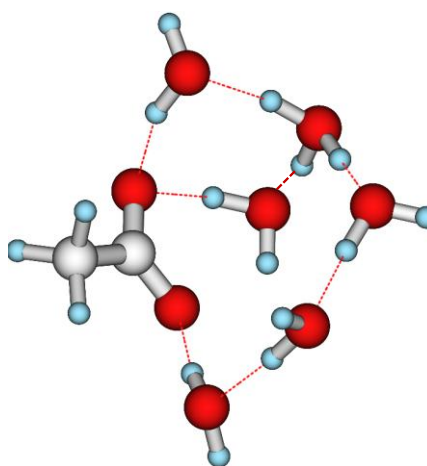

$\Delta E = +9.5$  kcal/mol



h)  $\text{CH}_3\text{COOH} \cdot 7\text{H}_2\text{O}$

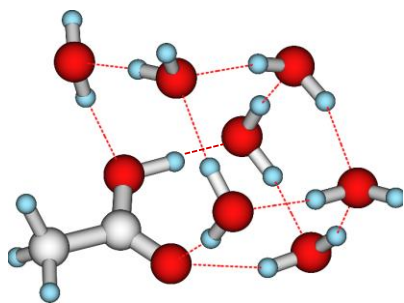

$\Delta E = 0$  kcal/mol

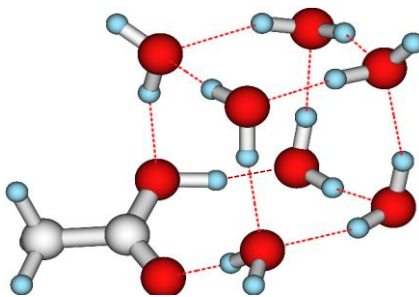

$\Delta E = +0.4$  kcal/mol

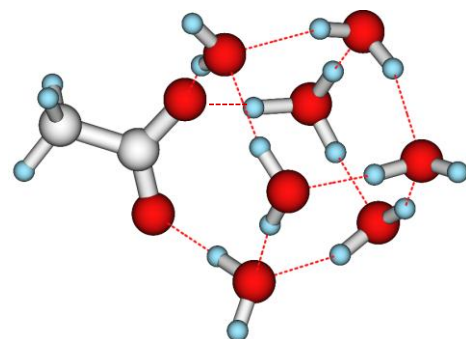

$\Delta E = +1.3$  kcal/mol

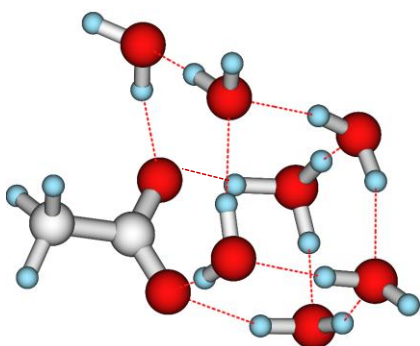

$\Delta E = 1.5$  kcal/mol

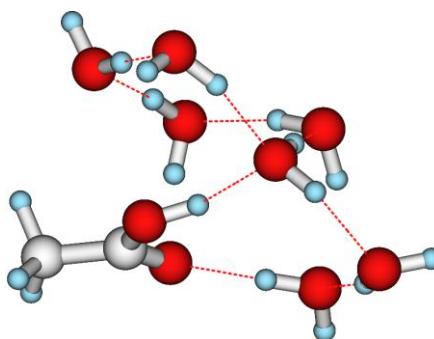

$\Delta E = +1.6$  kcal/mol

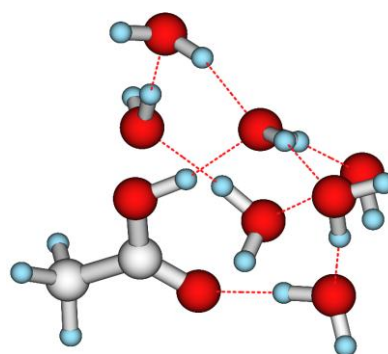

$\Delta E = +1.7$  kcal/mol

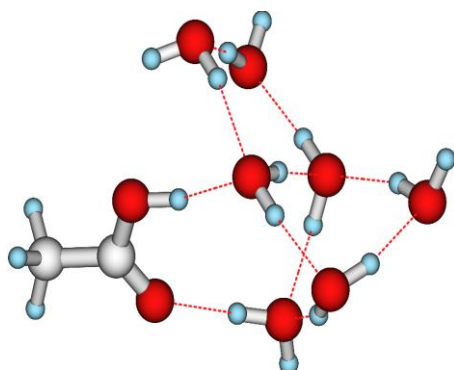

$\Delta E = 2.2$  kcal/mol

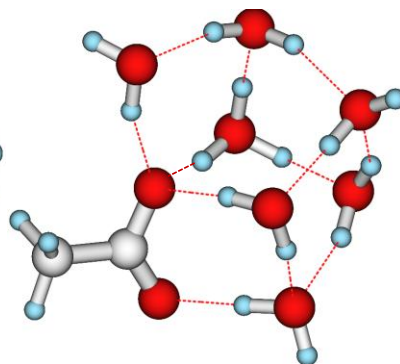

$\Delta E = +3.2$  kcal/mol

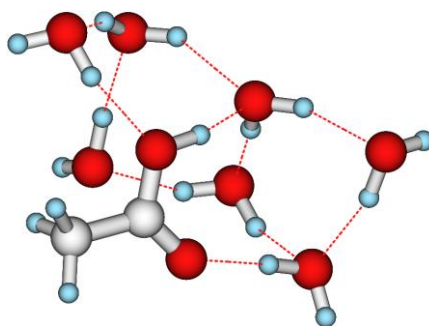

$\Delta E = +3.4$  kcal/mol

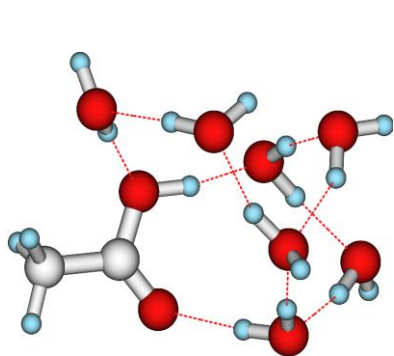

$\Delta E = 3.6$  kcal/mol

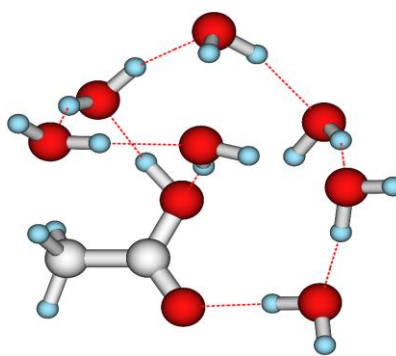

$\Delta E = +4.0$  kcal/mol

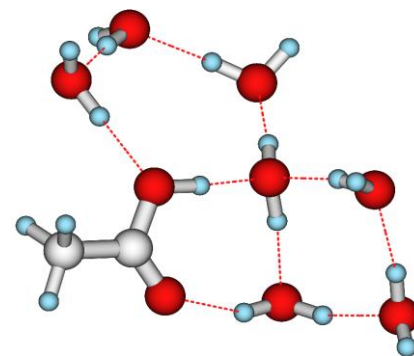

$\Delta E = +5.0$  kcal/mol

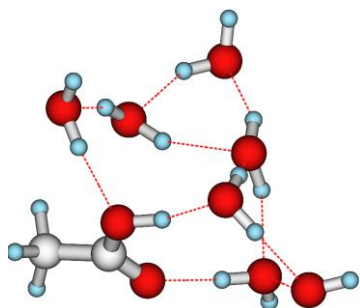

$\Delta E = 5.0$  kcal/mol

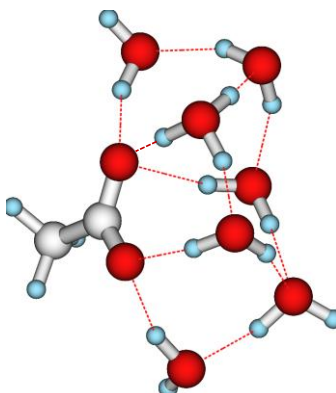

$\Delta E = +5.8$  kcal/mol

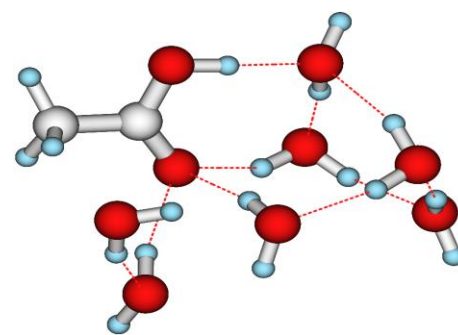

$\Delta E = +6.6$  kcal/mol

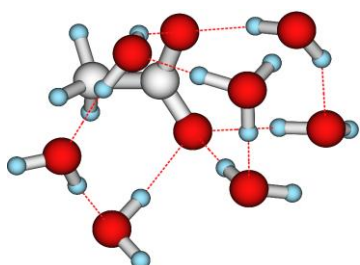

$\Delta E = 7.2$  kcal/mol

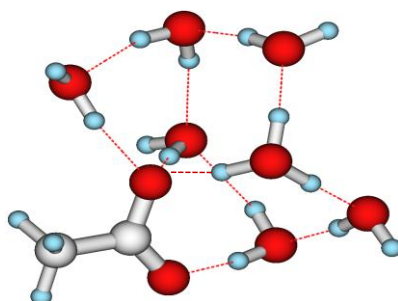

$\Delta E = +7.4$  kcal/mol

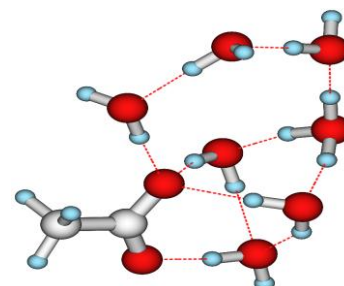

$\Delta E = +7.9$  kcal/mol

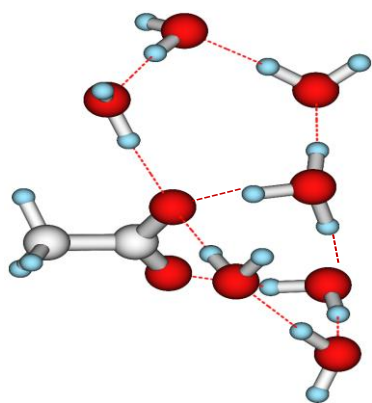

$\Delta E = 8.1$  kcal/mol

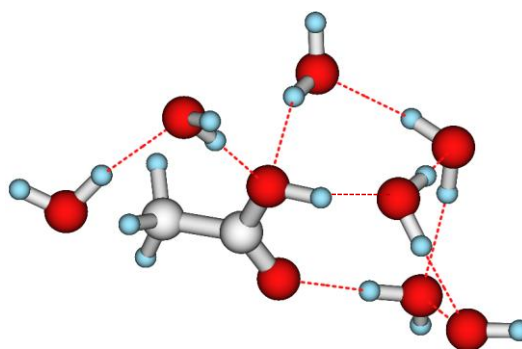

$\Delta E = +8.9$  kcal/mol

i)  $\text{CH}_3\text{COOH} \cdot 8\text{H}_2\text{O}$

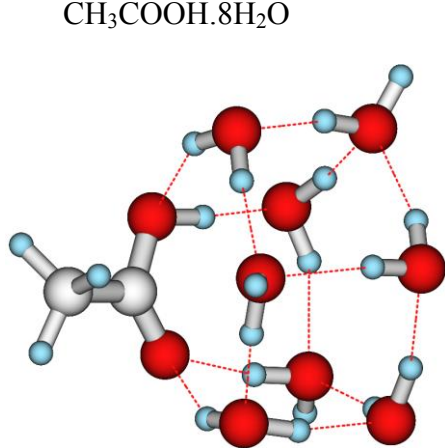

$\Delta E = 0$  kcal/mol

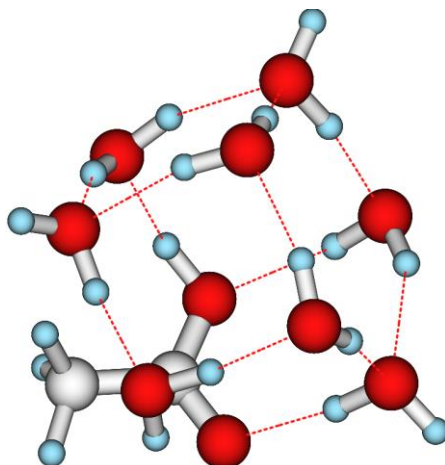

$\Delta E = +2.6$  kcal/mol

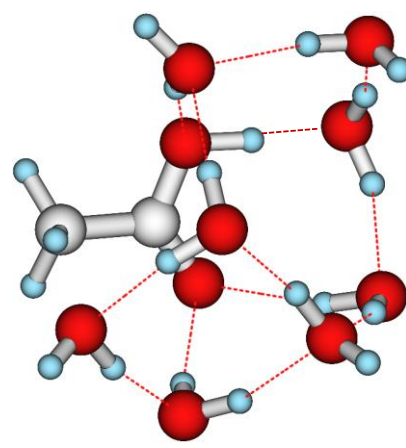

$\Delta E = +2.8$  kcal/mol

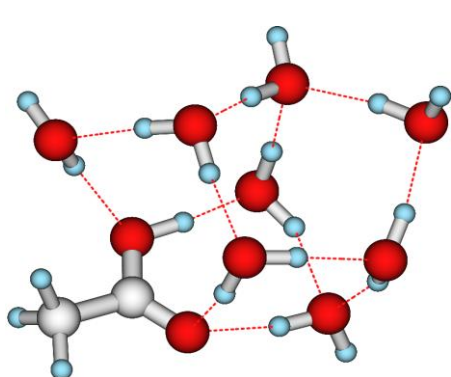

$\Delta E = +2.9$  kcal/mol

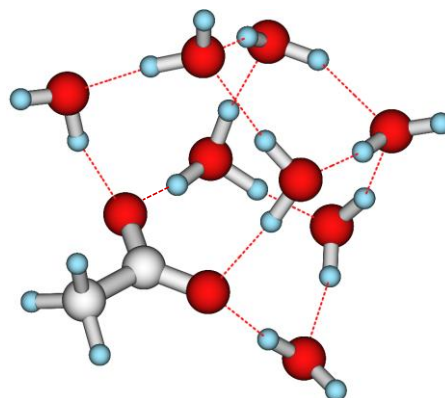

$\Delta E = +3.3$  kcal/mol

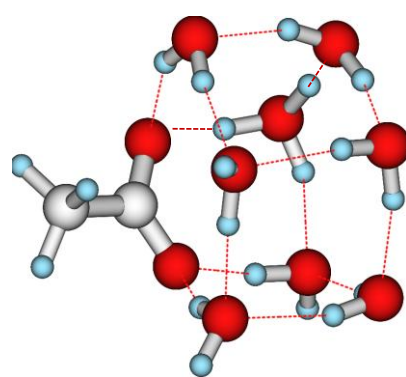

$\Delta E = +3.9$  kcal/mol

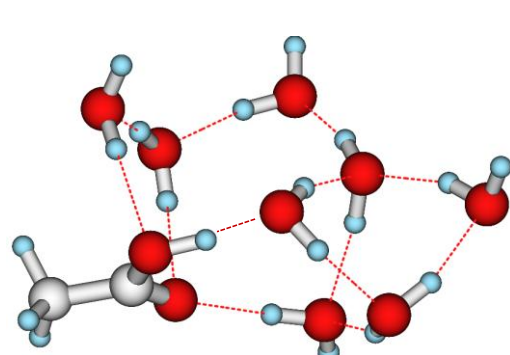

$\Delta E = +4.3$  kcal/mol

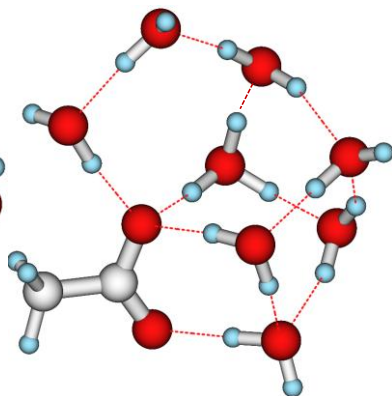

$\Delta E = +4.3$  kcal/mol

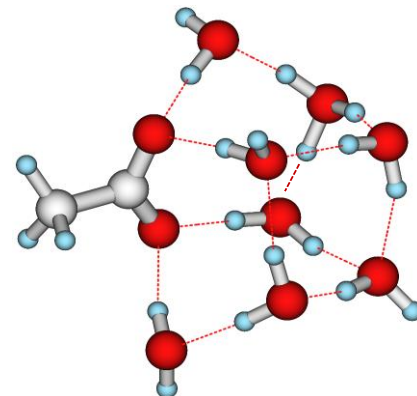

$\Delta E = +5.0$  kcal/mol



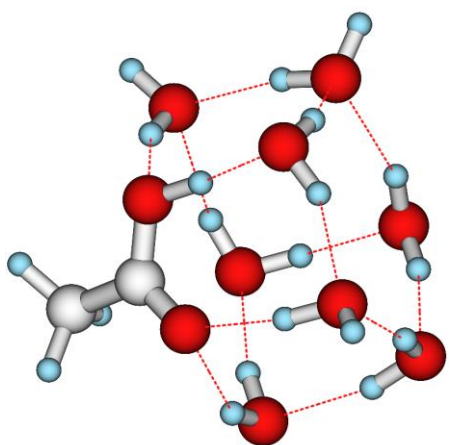

$\Delta E = +5.4$  kcal/mol

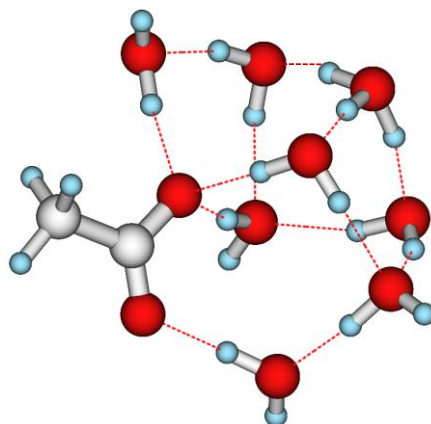

$\Delta E = +5.9$  kcal/mol

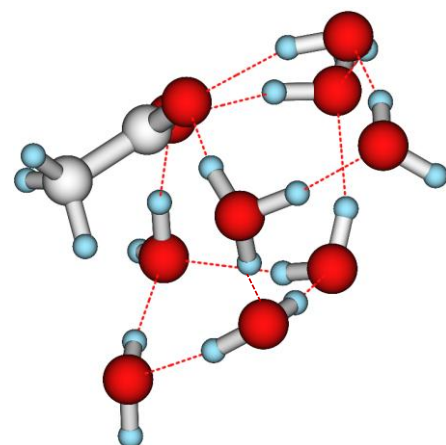

$\Delta E = +6.0$  kcal/mol

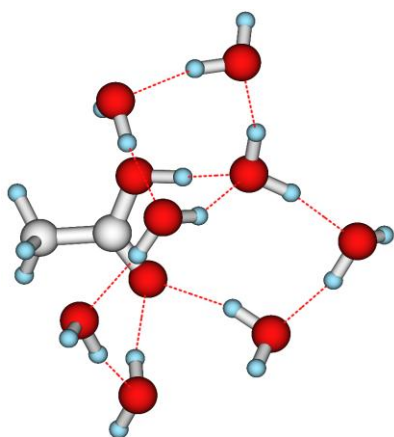

$\Delta E = +6.1$  kcal/mol

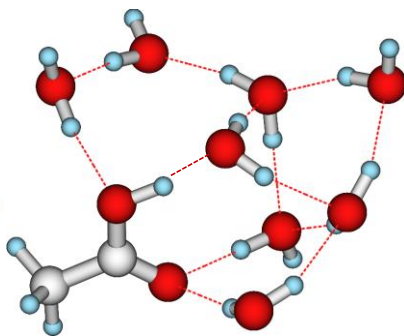

$\Delta E = +7.0$  kcal/mol

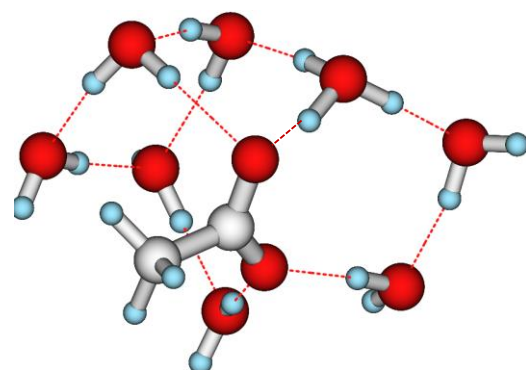

$\Delta E = +7.3$  kcal/mol

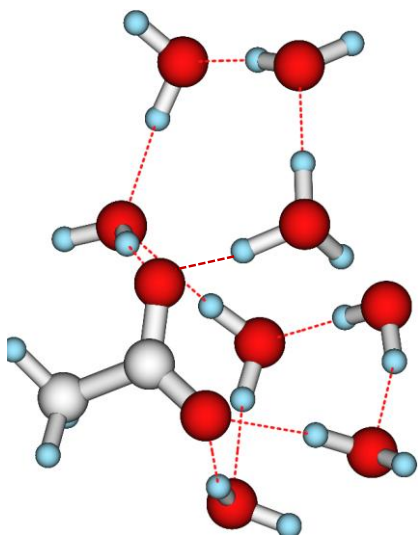

$\Delta E = +7.5$  kcal/mol

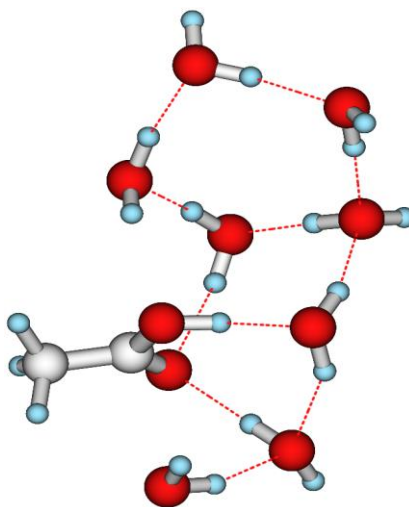

$\Delta E = +7.6$  kcal/mol

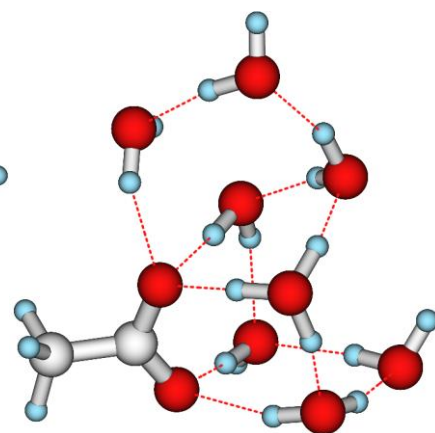

$\Delta E = +7.9$  kcal/mol

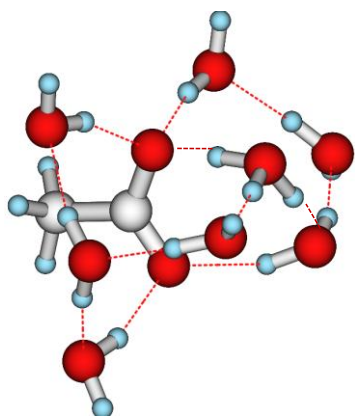

$\Delta E = +8.3$  kcal/mol

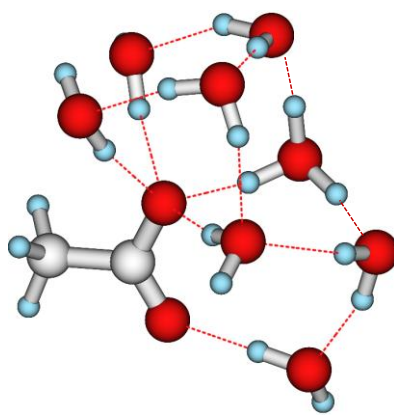

$\Delta E = +9.3$  kcal/mol

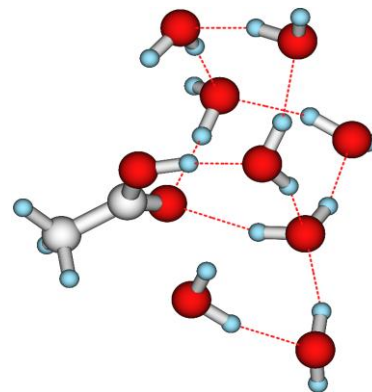

$\Delta E = +9.3$  kcal/mol

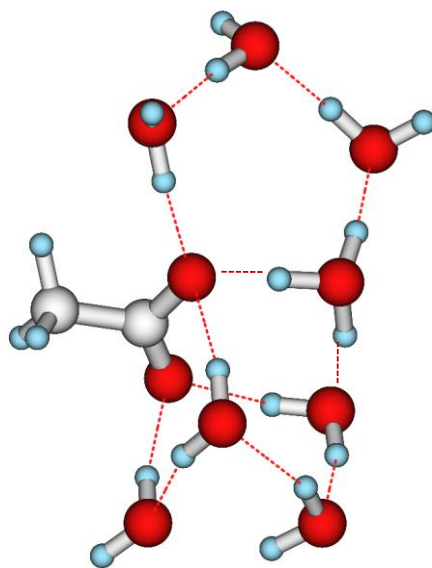

$\Delta E = +9.4$  kcal/mol

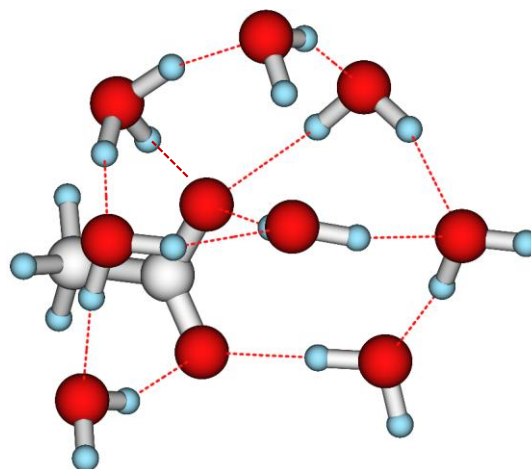

$\Delta E = +9.5$  kcal/mol

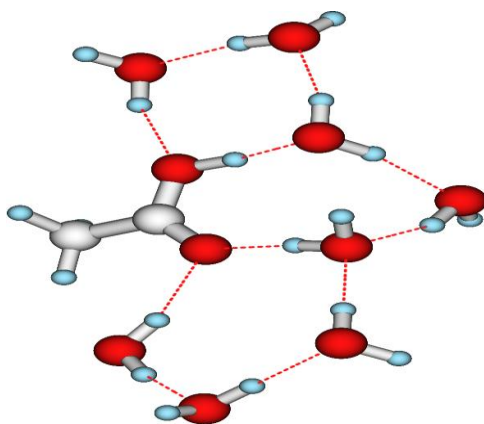

$\Delta E = +12.8$  kcal/mol

Figure S2. Simulated, scaled (scaling factor 0.93) IR spectra of the most stable structure of a) acoh; b) acoh.1H<sub>2</sub>O; c) acoh.2H<sub>2</sub>O; d) acoh.3H<sub>2</sub>O; e) acoh.4H<sub>2</sub>O; f) acoh.5H<sub>2</sub>O; g) acoh.6H<sub>2</sub>O; h) acoh.7H<sub>2</sub>O and i) acoh.8H<sub>2</sub>O calculated at  $\omega$ B97X-D/aug-cc-pVDZ level of theory.

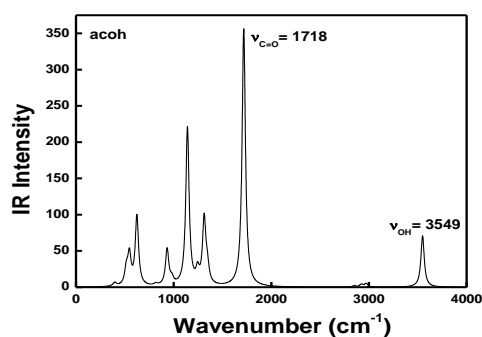

a

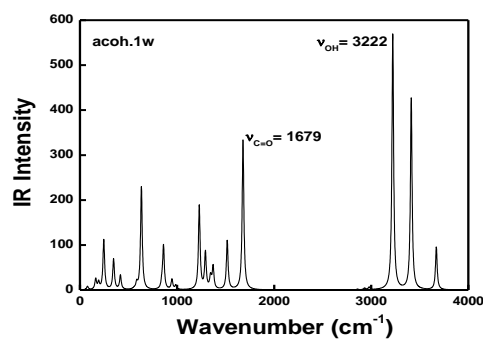

b

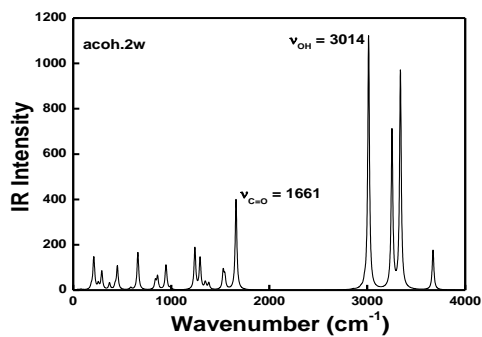

c

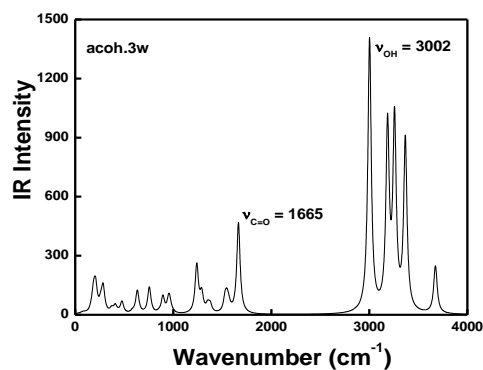

d



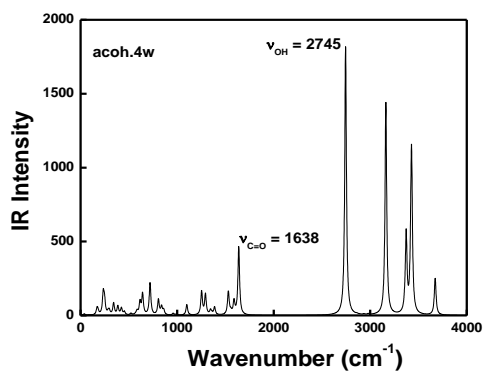

**e**

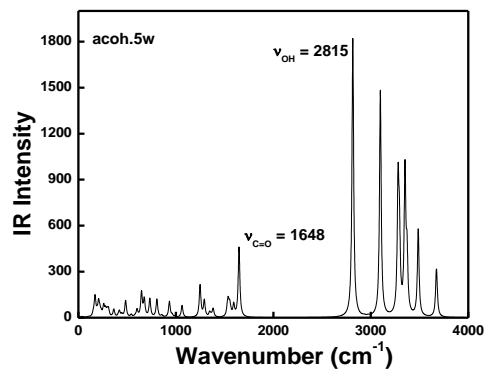

**f**

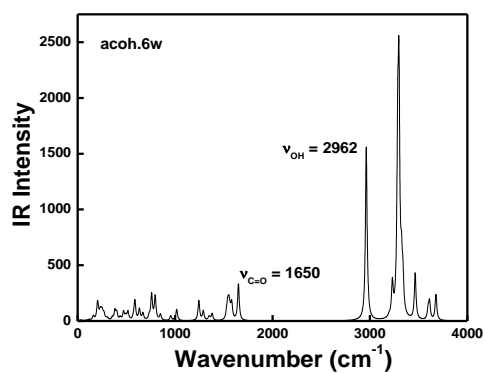

**g**

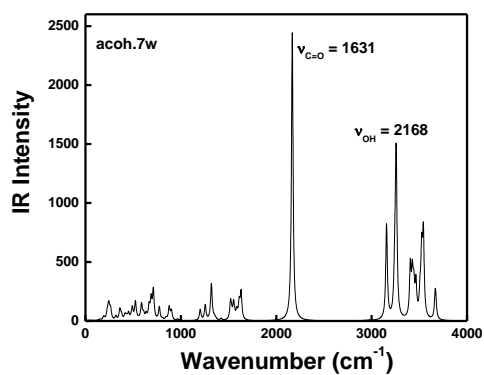

**h**

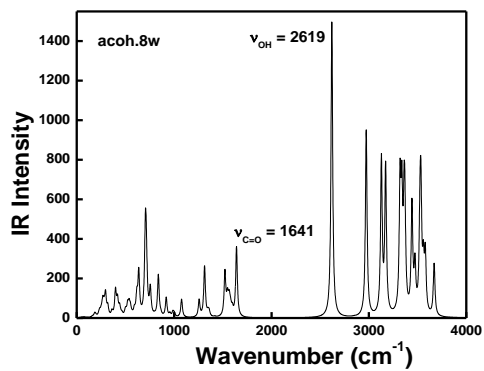

**i**
